# Supplementary material for: The RNA Helicases AtMTR4 and HEN2 Target Specific Subsets of Nuclear Transcripts for Degradation by the Nuclear Exosome in Arabidopsis thaliana
Source: PubMed Central journal article supplement (PMC4140647; doi:10.1371/journal.pgen.1004564), 2014-08-21

|                     |     |                                                                                                     |     |
|---------------------|-----|-----------------------------------------------------------------------------------------------------|-----|
| MTR4_Athaliana      | 583 | Y C L P F L L P N R A V C L D C T N D - - D E E P Q S F S I E D Q D T W G V I M K F N K V K S L S E | 630 |
| MTR4_Thalophila     | 585 | Y C L P F L L P N R A V C L D C T N D - - D G E P Q S F S I E N Q D A W G V I M K F S K V K S T S E | 632 |
| MTR4_Sitalica       | 597 | H V L P F L Q P G R L V R L E Y S - - - - T D E P A T F S I D E N I T W G I I I N F E K V K S H G E | 642 |
| MTR4_Mguttatus      | 589 | H C L P F L Q P G R L V S I Q C T K N - - D E D S S S F S M K D E I T W G V I I N F E R V K T V S E | 636 |
| MTR4_Pvulgaris      | 582 | H C L P F L Q P G R L V S L E C T S S - - N E D L T P I F I E D Q L T W G L V V N F E R V K S V S D | 629 |
| MTR4_Mtruncatula    | 584 | H C L P Y L Q P G R L V S L Q C T S S - - E E D L V P I F I E D Q L T W G L I I N F E R I K G V S E | 631 |
| MTR4_Mesculenta     | 586 | H C L P F L Q A G R I V C L Q C T G T - - D E N S P S F S I E D Q V T W G V I I N F E R V K E F S E | 633 |
| MTR4_Ptrichocarpa   | 607 | H C L S Y L Q S G R L V C I Q C T E S - - D D K S P S F L I E D L V T W G V I V N F D R V K G V S D | 654 |
| MTR4_Csativus       | 588 | Y C L P F L Q P G R L V S I E C N R N - - D E I S S T F S I K D Q V T W G L I I N F Q R V K G V S E | 635 |
| MTR4_Egrandis       | 588 | Y S L P F L Q P G R L V S I E C T S S - - D K S G S S F S M E D Q A T W G V I I N F E R V R S A S E | 635 |
| MTR4_Smoellindorfii | 578 | S C L P F L Q P G R L V R I F R S A D A V E Q Q N S V L M E Q D P A V W G V I I N F E K A Q - - S K | 625 |
| MTR4_Ppatens        | 605 | Y S L P Y L Q P G R L V Q I A R A T N - - Q D D L T V P V K K V T P V W G V I V N F E K V Q T A A K | 652 |
| MTR4_Scerevisiae    | 704 | N A L S F L Q P G R L V E I S V N G K - - - - - - - - - - D N Y G W G A V V D F A K R I N K R N     | 741 |
| HEN2_Athaliana      | 601 | R V L C F L D T G R L V K I R E G G T - - - - - - - - - - - - D W G W G V V V N V V K N S S V G T   | 637 |
| HEN2_Thalophila     | 601 | R V L C F L D T G R L I K I R E G G T - - - - - - - - - - - - D W G W G V V V N V V K K P S V G T   | 637 |
| HEN2_Sitalica       | 609 | R A L L Y L V P G R L V K V R D G S T - - - - - - - - - - - - D W G W G V V V N V V K K P P A S G   | 645 |
| HEN2_Mguttatus      | 598 | R V L S F L Q P G R L V K V R E G G T - - - - - - - - - - - - D W G W G V V V N V V K K P P A P S   | 634 |
| HEN2_Pvulgaris      | 597 | I I L Y F L V P G R L I K V R E G G T - - - - - - - - - - - - D W G W G V V V N V V K K P - - - -   | 629 |
| HEN2_Mtruncatula    | 600 | M I L Y F L V P G R L I K V R E G G T - - - - - - - - - - - - D W G W G V V V N V V K K P - - - -   | 632 |
| HEN2_Mesculenta     | 593 | R V L Y Y L C T G R L I K V R E G G T - - - - - - - - - - - - D W G W G V V V N V V K K P A P G L   | 629 |
| HEN2_Ptrichocarpa   | 591 | R I L Y Y L C T G R L I K V R E G G T - - - - - - - - - - - - D W G W G V V V N V V K K P T A G L   | 627 |
| HEN2_Csativus       | 620 | R V L Y F L L P G R L V K V R E G G T - - - - - - - - - - - - D W G W G V V V N V V K K P S A G L   | 656 |
| HEN2_Egrandis       | 599 | R V L Y F L L P G R L V R I R E G G T - - - - - - - - - - - - D W G W G V V V N V I K K P S T G L   | 635 |
| HEN2_Smoellindorfii | 571 | R I I V F L Q P G R L V K V R D G A D - - - - - - - - - - - - D W G W G V V I N V V K K P T P G G   | 607 |
| HEN2_Ppatens        | 617 | R V L L F M K P G R L V K I R D G S D - - - - - - - - - - - - E W G W G V V V H V V K K P T S N Q   | 653 |

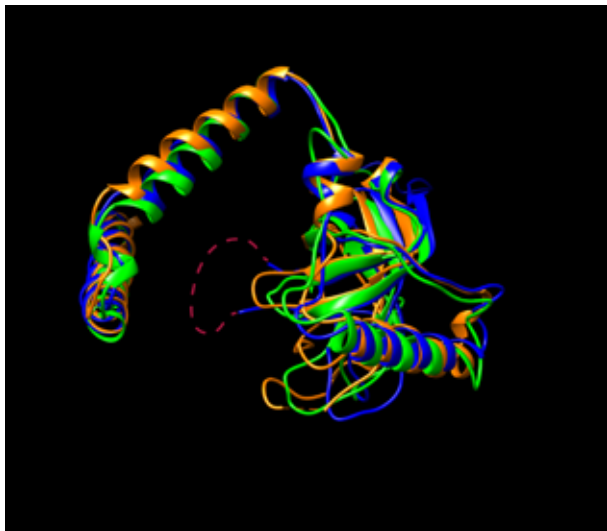

Supplement: pgen.1004564.s003.pdf [file pgen.1004564.s003.pdf]
