# Supplementary material for: The RNA Helicases AtMTR4 and HEN2 Target Specific Subsets of Nuclear Transcripts for Degradation by the Nuclear Exosome in Arabidopsis thaliana
Source: PLoS Genet. 2014 Aug 21;10(8):e1004564. doi: 10.1371/journal.pgen.1004564 (PMC4140647; doi:10.1371/journal.pgen.1004564)
Supplement: Figure S7 — Sequence alignment of human RBM7 and Arabidopsis At4g10110. (PDF) [file pgen.1004564.s009.pdf]

RBM7\_HUMAN MGAAAAEADRTL FVGNLETKVTEELL FELFHQAGPVIKVKIPKDKD-GKPKQFAFVNFKH  
At4g10110\_ARATH ---MSGTSNCTVYIGNVDERVSDRVL YDIMIQAGRVIDLHIPRDKETDKPKGFAFAEYET  
:. :: \*:::\*:::: \*:::: \*:::: \*\*\* \*\* .::\*:\*\*:: \*\*\* \*\*\*.:::

RBM7\_HUMAN EVSVPYAMNLLNGIK-LYGRPIKIQFRSGSS-----HAPQDVSL SYPQHHVGNS  
At4g10110\_ARATH EEIADYAVKLF SGLVSLYNRTLKFAISGQDKLQSN SANS GHRARPQSL--AFEHSDR---  
\* . \*\*::\*:.\*: \*\* \* :\*: : . .. \*\*.: :: : .

RBM7\_HUMAN SPTSTSPSRYERTMDNMTSSAQIIQRSFSSPENFQRQAVMN--SALRQMSYGGKFGSSPL  
At4g10110\_ARATH -----AAYHH-LER--FSSQLISPPSPLPLDYTQEPPPPGVSNGASLEYSRRVLGSAL  
: \*. : :. \*:\*:\*. \* :: :: \* .:.\*. :. .\* \*

RBM7\_HUMAN DQSGFSPSVQSHSHSFNQSSSSQWRQGTPSSQRKVRMNSYPYLADRHYSREQRYTDHGSD  
At4g10110\_ARATH D-----SINH SR-----PRRY-----  
\* \*:\*:\*: \*\*:\*

RBM7\_HUMAN HHYRGKRDDFFYEDRNHDDWSHDYDNRRDSSRDGKWRSSRH  
At4g10110\_ARATH -----
