# Supplementary material for: The RNA Helicases AtMTR4 and HEN2 Target Specific Subsets of Nuclear Transcripts for Degradation by the Nuclear Exosome in Arabidopsis thaliana
Source: PubMed Central journal article supplement (PMC4140647; doi:10.1371/journal.pgen.1004564), 2014-08-21
Supplement: pgen.1004564.s011.pdf [file pgen.1004564.s011.pdf]

### A At3g26510

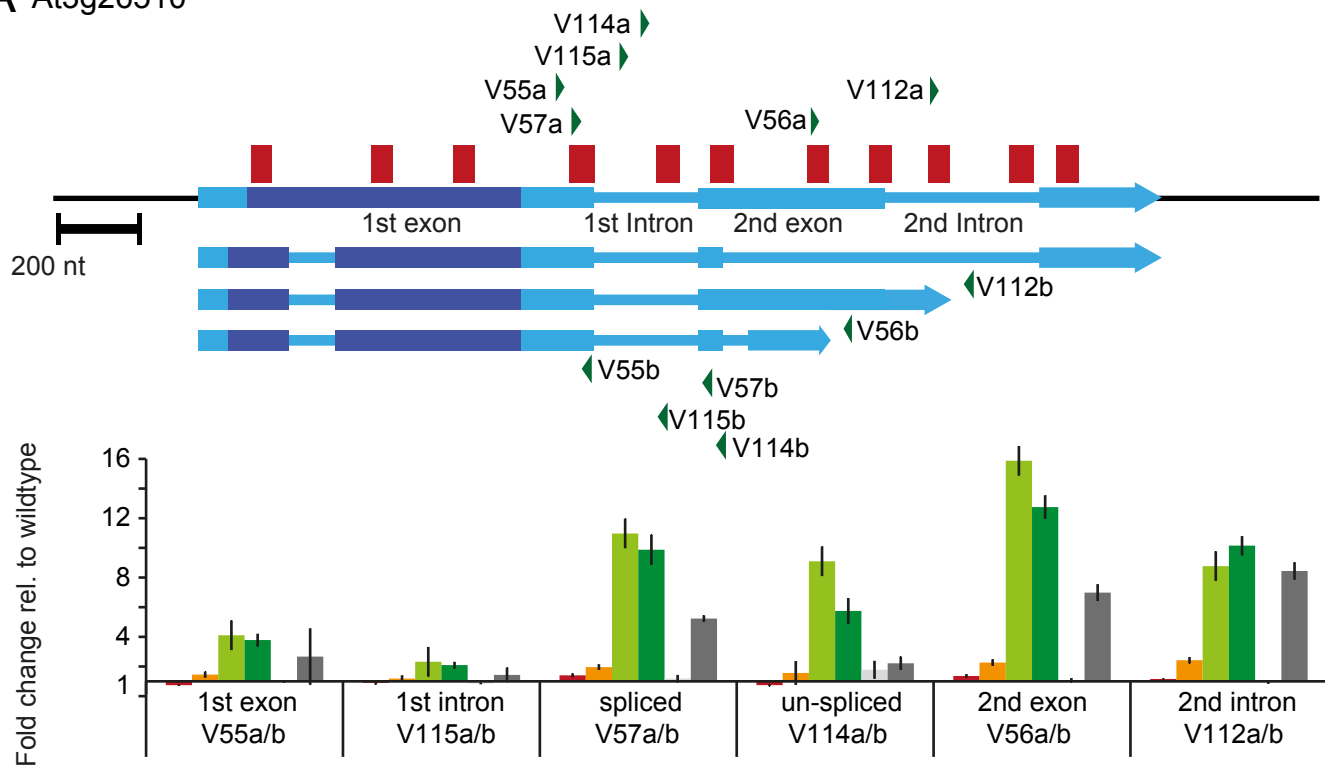

### B At1g58602

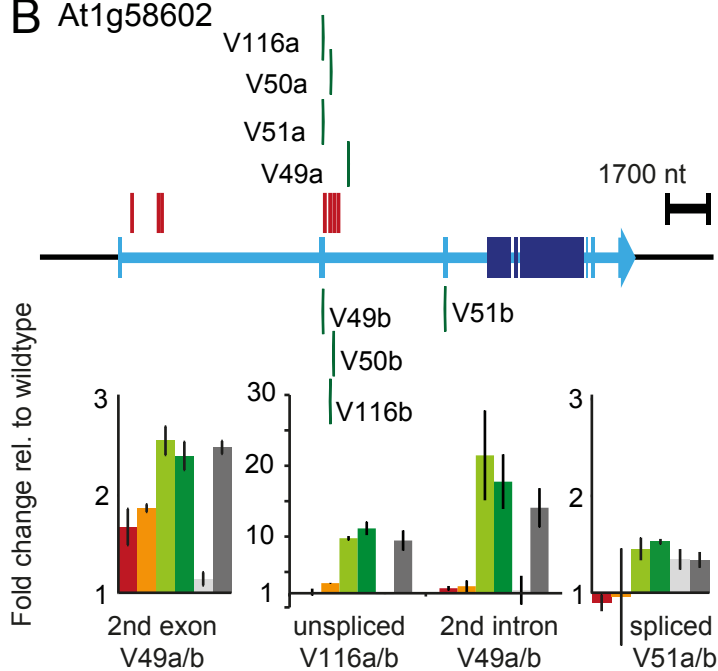

### C At3g43160

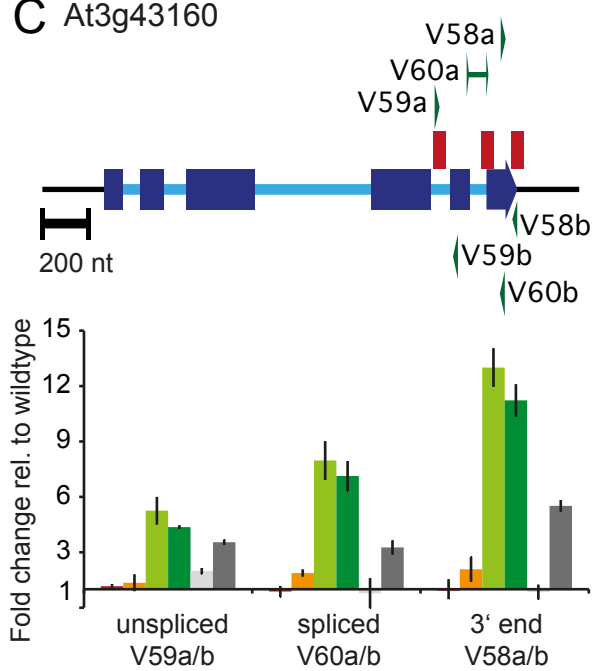

■ *mtr4-1*   ■ *hen2-2*   ■ *RRP41* ctrl    exon   ■ CDS   ■ detected probes  
■ *mtr4-2*   ■ *hen2-4*   ■ *RRP41* RNAi    intron   ▶ mRNA   ▶ qPCR primer
