# Supplementary material for: The RNA Helicases AtMTR4 and HEN2 Target Specific Subsets of Nuclear Transcripts for Degradation by the Nuclear Exosome in Arabidopsis thaliana
Source: PubMed Central journal article supplement (PMC4140647; doi:10.1371/journal.pgen.1004564), 2014-08-21
Supplement: pgen.1004564.s014.pdf [file pgen.1004564.s014.pdf]

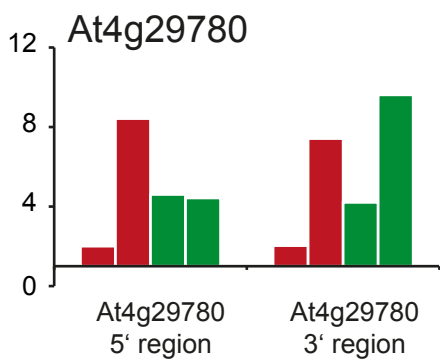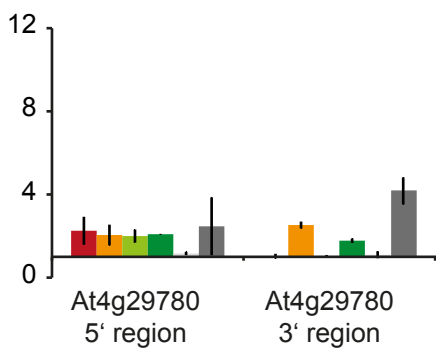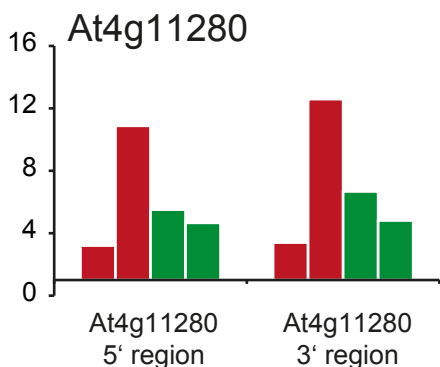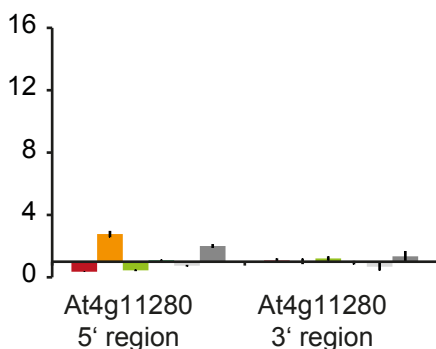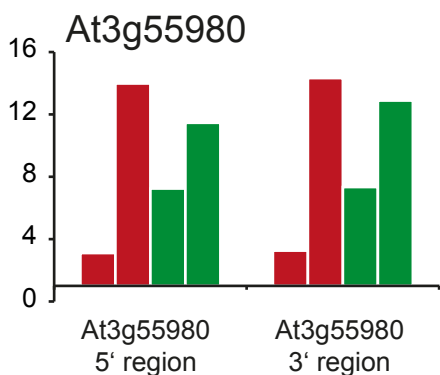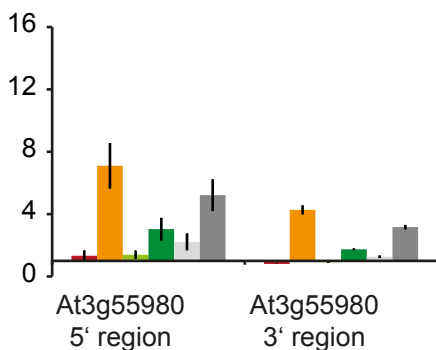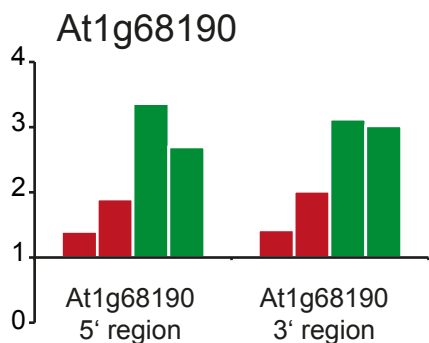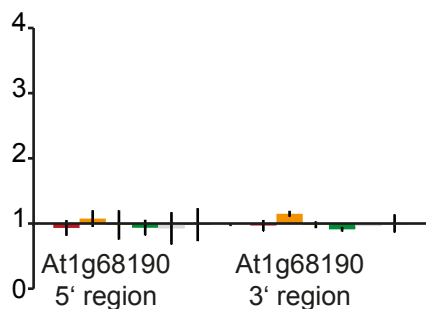

samples used for the tiling analysis

other samples grown in same culture conditions

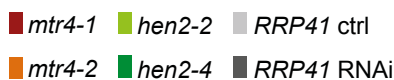

Fold change relative to wildtype
