# Supplementary material for: The RNA Helicases AtMTR4 and HEN2 Target Specific Subsets of Nuclear Transcripts for Degradation by the Nuclear Exosome in Arabidopsis thaliana
Source: PubMed Central journal article supplement (PMC4140647; doi:10.1371/journal.pgen.1004564), 2014-08-21

WT    *mtr4-1*    *mtr4-2*    *hen2-2*    *hen2-4*    RRP41 Ctrl    RRP41 RNAi

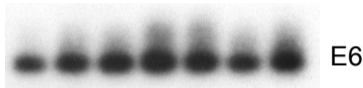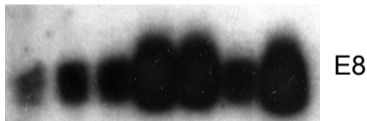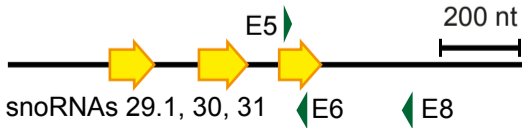

Supplement: pgen.1004564.s015.pdf [file pgen.1004564.s015.pdf]
