# Supplementary material for: The RNA Helicases AtMTR4 and HEN2 Target Specific Subsets of Nuclear Transcripts for Degradation by the Nuclear Exosome in Arabidopsis thaliana
Source: PubMed Central journal article supplement (PMC4140647; doi:10.1371/journal.pgen.1004564), 2014-08-21

Averaged expression of upregulated probes in both replicates  
(log intensities)

16  
14  
12  
10  
8  
6  
4

WT

*hen2*

WT

*mtr4*

*hen2*

*mtr4*

for probes  
upregulated  
in *hen2*

for probes  
upregulated  
in *mtr4*

for probes  
upregulated  
in both

\*\*

\*\*

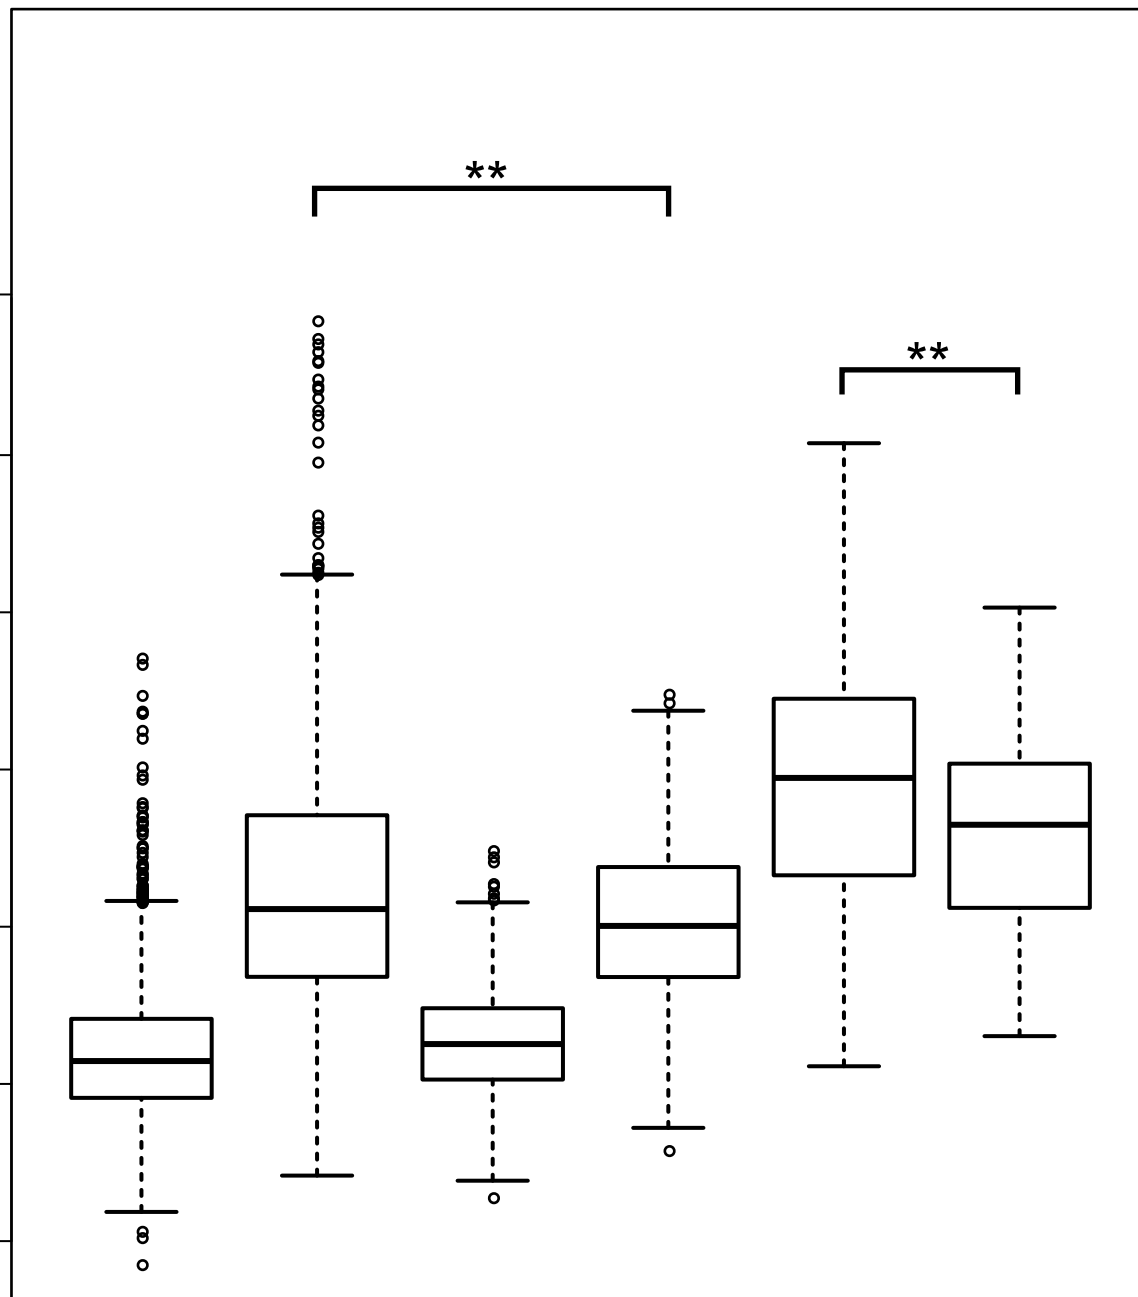

Supplement: pgen.1004564.s017.pdf [file pgen.1004564.s017.pdf]
