# Supplementary material for: The RNA Helicases AtMTR4 and HEN2 Target Specific Subsets of Nuclear Transcripts for Degradation by the Nuclear Exosome in Arabidopsis thaliana
Source: PubMed Central journal article supplement (PMC4140647; doi:10.1371/journal.pgen.1004564), 2014-08-21
Supplement: pgen.1004564.s018.pdf [file pgen.1004564.s018.pdf]

## AT1G20100

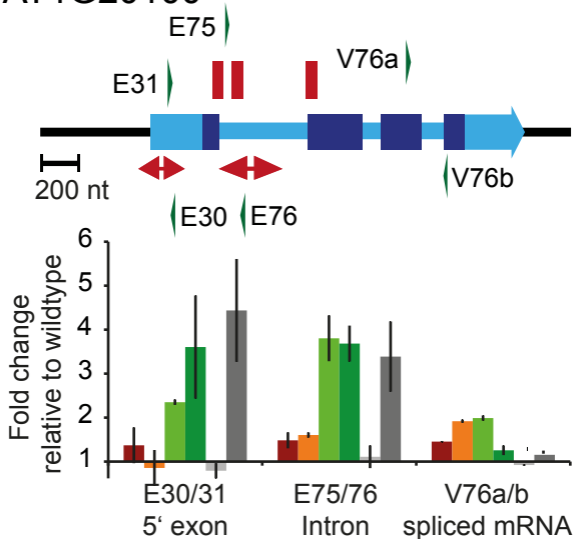

## At5g27720

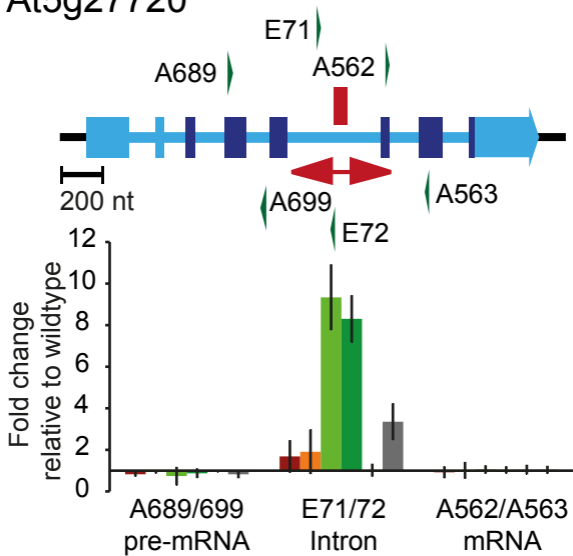

## At4g02890

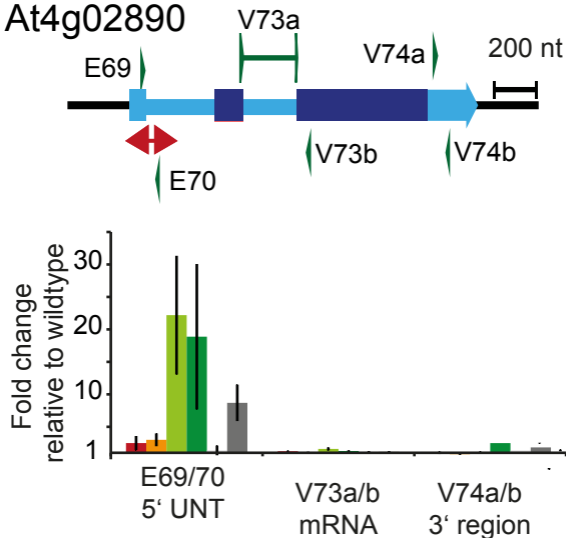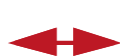

region detected in previous study of exosome mutants

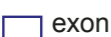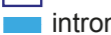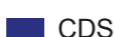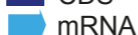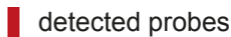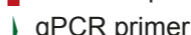

*mtr4-1*    *hen2-2*    *RRP41* ctrl

*mtr4-2*    *hen2-4*    *RRP41* RNAi
