# Supplementary material for: The RNA Helicases AtMTR4 and HEN2 Target Specific Subsets of Nuclear Transcripts for Degradation by the Nuclear Exosome in Arabidopsis thaliana
Source: PubMed Central journal article supplement (PMC4140647; doi:10.1371/journal.pgen.1004564), 2014-08-21

AtMTR4-GFP

DAPI

Overlay

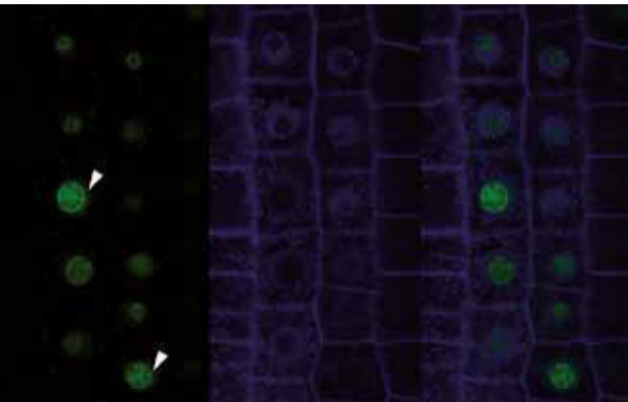

Supplement: pgen.1004564.s019.pdf [file pgen.1004564.s019.pdf]
